# Supplementary material for: Measurement report: Atmospheric nitrate radical chemistry in the South China Sea influenced by the urban outflow of the Pearl River Delta
Source: Copernicus journal article supplement (doi:10.5194/egusphere-2023-1401), 2023-07-25
Supplement: Supplementary file 1 [file egusphere-2023-1401-supplement.pdf]

1 **Supporting information for**

2

3 Wang et al.,

4

5 *Correspondence to:* Haichao Wang (wanghch27@mail.sysu.edu.cn); Yee Jun Tham  
6 (thamyj@mail.sysu.edu.cn)

7

8 **Contents**

9 **Figure S1.** The wind rose plot for NO concentrations (ppbv) and wind direction.

10 **Figure S2.** Fits O<sub>3</sub> against NO<sub>2</sub> during the nocturnal time.

11 **Figure S3.** N<sub>2</sub>O<sub>5</sub> uptake coefficients derived from the pseudo steady state method.

12 **Figure S4.** Nighttime NO mixing ratio and its contribution to NO<sub>3</sub> loss.

13

14

15

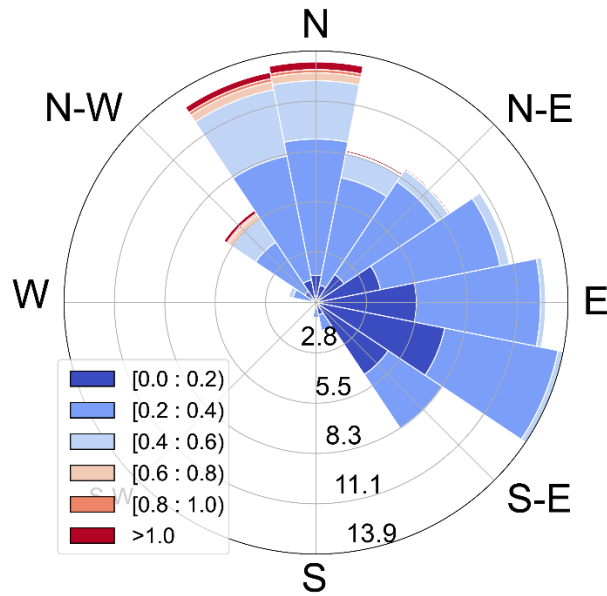

16

17 Figure S1. The wind rose plot for NO concentrations (ppbv) and wind direction.

18

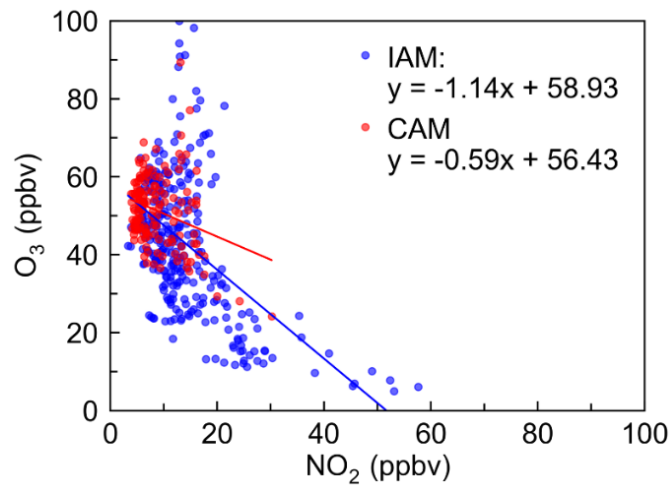

19

20 Figure S2. Fits O<sub>3</sub> against NO<sub>2</sub> during the nocturnal time with a time resolution of 1 hour  
21 for air mass from inland China (IAM) and coastal areas (CAM).

22

23

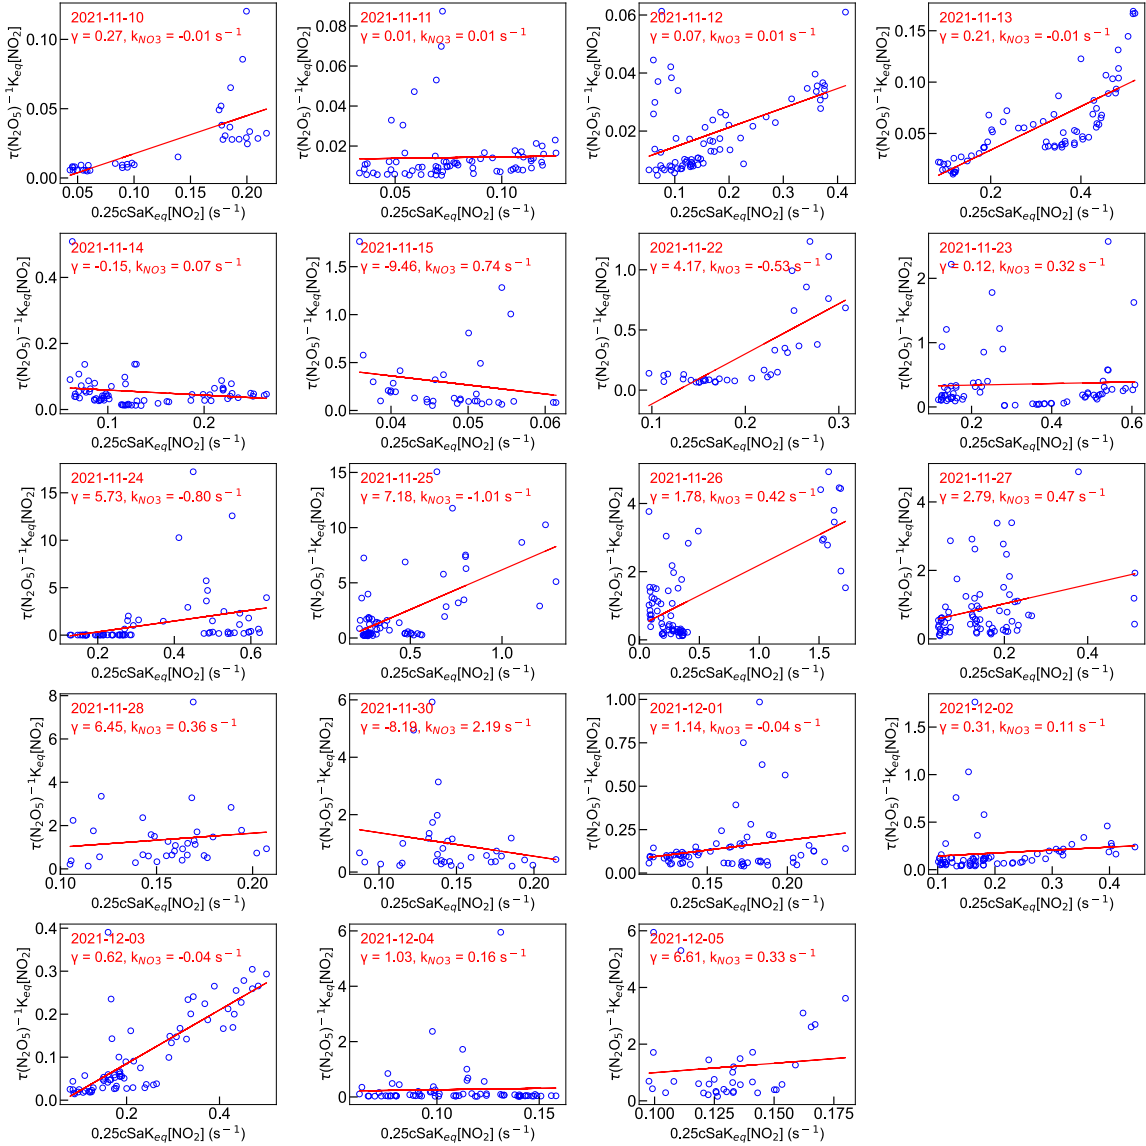

24

25 Figure S3. N<sub>2</sub>O<sub>5</sub> uptake coefficients derived from scatter plots of  $K_{eq}[NO_2]\tau(N_2O_5)^{-1}$   
 26 versus  $0.25cSaK_{eq}[NO_2]$ ,  $K_{eq}$ : the equilibrium constant between N<sub>2</sub>O<sub>5</sub>, NO<sub>2</sub>, and NO<sub>3</sub>;  $c$ :  
 27 the mean molecular speed of N<sub>2</sub>O<sub>5</sub>;  $Sa$ : the aerosol surface area density;  $\gamma$ : the N<sub>2</sub>O<sub>5</sub> uptake  
 28 coefficient;  $k_{NO_3}$ : the indirect NO<sub>3</sub> loss frequency.

29

30

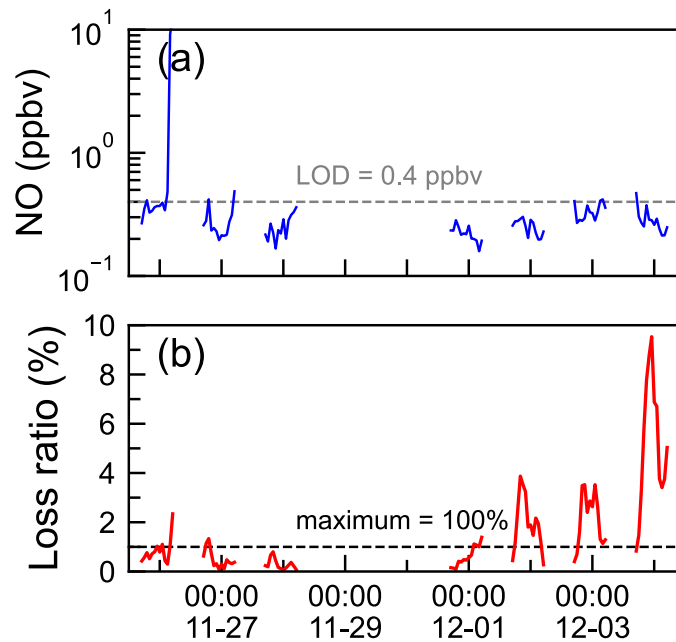

31

32 Figure S4. (a) Nighttime NO mixing ratio with the gray dashed line denoting the detection  
33 limit of the instrument (0.4 ppbv). (b) The fraction ratio of NO to NO<sub>3</sub> loss, with the black  
34 dashed line representing a maximum of 100%.
